# Supplementary material for: Characterization of SERS platforms designed by electrophoretic deposition on CVD graphene and ITO/glass
Source: Royal Society of Chemistry journal article supplement (doi:10.1039/d0ma00333f), 2020-01-01
Supplement: d0ma00333f1.pdf [file d0ma00333f1.pdf]

## Supplementary Information.

# Characterization of SERS Platforms Designed by Electrophoretic Deposition on CVD Graphene and ITO/glass.

Federico Fioravanti,<sup>#</sup> David Muñetón Arboleda,<sup>†</sup> Gabriela I. Lacconi,<sup>\*#</sup> and Francisco J. Ibañez<sup>\*†</sup>

<sup>#</sup>Instituto de Investigaciones en Físico-Química de Córdoba (INFIQC), CONICET. Dpto. de Fisicoquímica, Facultad de Ciencias Químicas, Universidad Nacional de Córdoba. Haya de La Torre-Medina Allende. 5000 Córdoba, Argentina.

<sup>†</sup>Instituto de Investigaciones Fisicoquímicas, Teóricas y Aplicadas (INIFTA). Universidad Nacional de La Plata - CONICET. Sucursal 4 Casilla de Correo 16 (1900) La Plata, Argentina.

Authors to whom correspondence should be addressed:

[glacconi@fcq.unc.edu.ar](mailto:glacconi@fcq.unc.edu.ar),

[fjiban@inifta.unlp.edu.ar](mailto:fjiban@inifta.unlp.edu.ar)

**S1. Transient current.** Chronoamperometry (current vs. time) for achieving EPD of Au NPs onto ITO/glass and graphene transferred to ITO/glass during 600 s which is the optimal coverage for SERS.

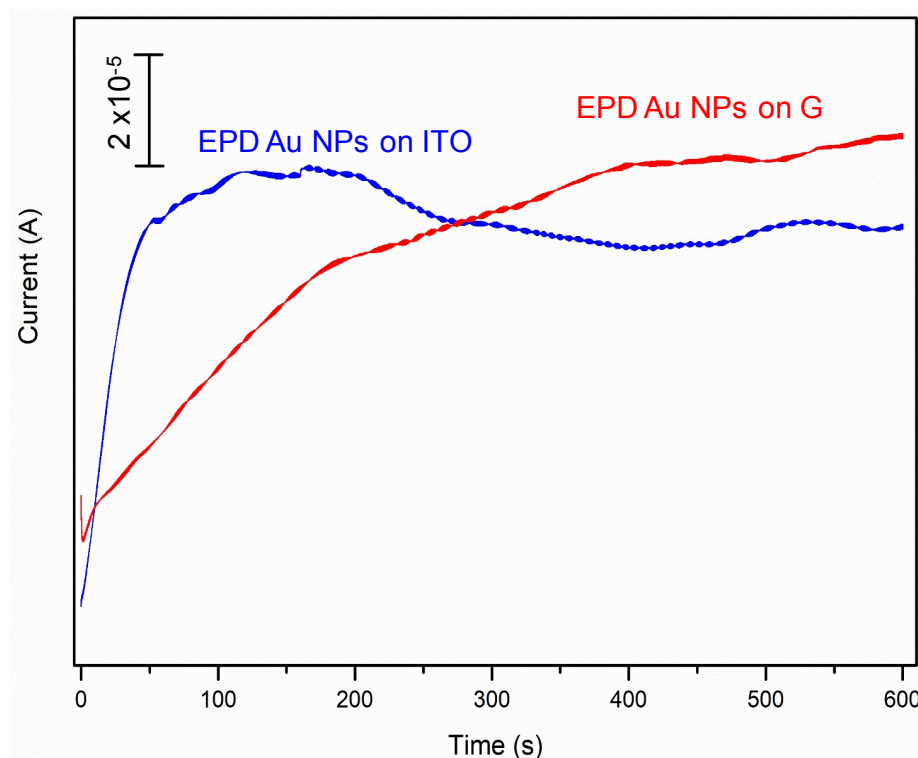

**Figure S1.** Chronoamperometry (CA) showing the current evolved during 600 s EPD of as-synthesized Au NPs on ITO/glass and CVD graphene transferred to ITO/glass electrode. The charge reached by both platforms was  $\sim 0.12$  C

**S2. Counting Au NPs on graphene.** Figure S2 and histogram exhibit a selected area called “low agglomerated area” on graphene formed by 600 s EPD. We choose this area in order to count how many NPs are per  $\mu\text{m}^2$  and compare with Au NPs deposited on ITO/glass under the same conditions. It should be mentioned that due to SEM resolution the 14 to 16 nm diam. Au NPs corresponded to the sum of 2 to 3 Au NPs (5 nm diam.) counted as one large NP.

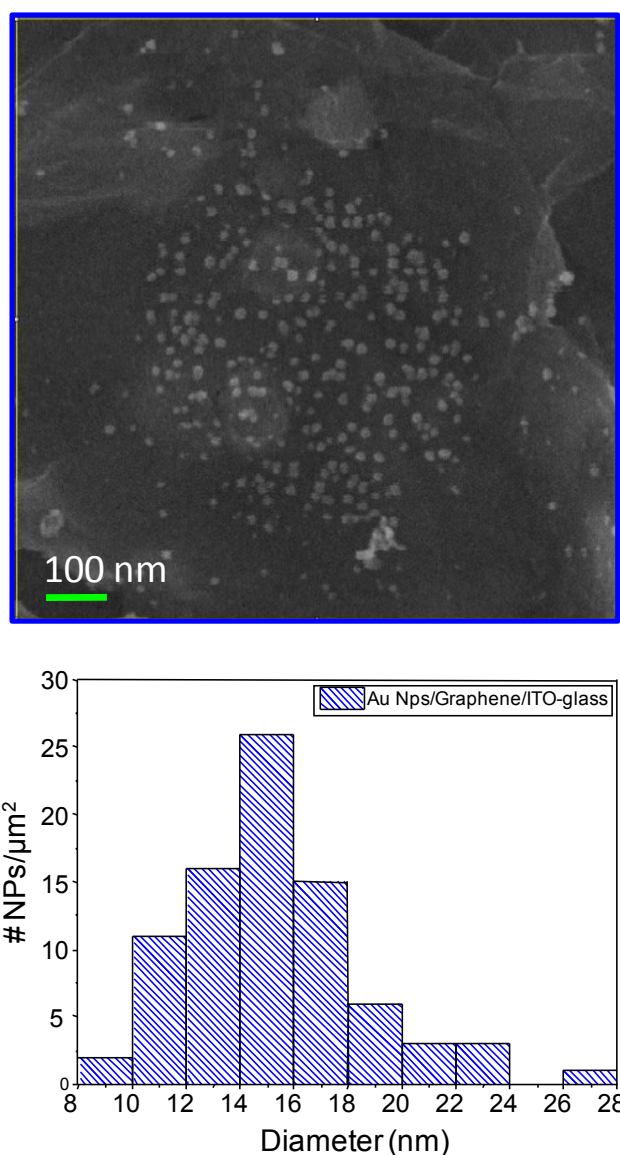

**Figure S2.** SEM image and its corresponding histogram which exhibit the # of Au NPs/ $\mu\text{m}^2$  counted in a selected “low agglomerated area” on graphene.

**S3. Immersion of both platforms in MB solution.** Fig. S3 and Table S1 show the time required for achieving similar SERS at both platforms. It shows that as-deposited Au NPs on ITO required 66 h for achieving a similar signal enhancement obtained by 10 min immersion of graphene-containing platform.

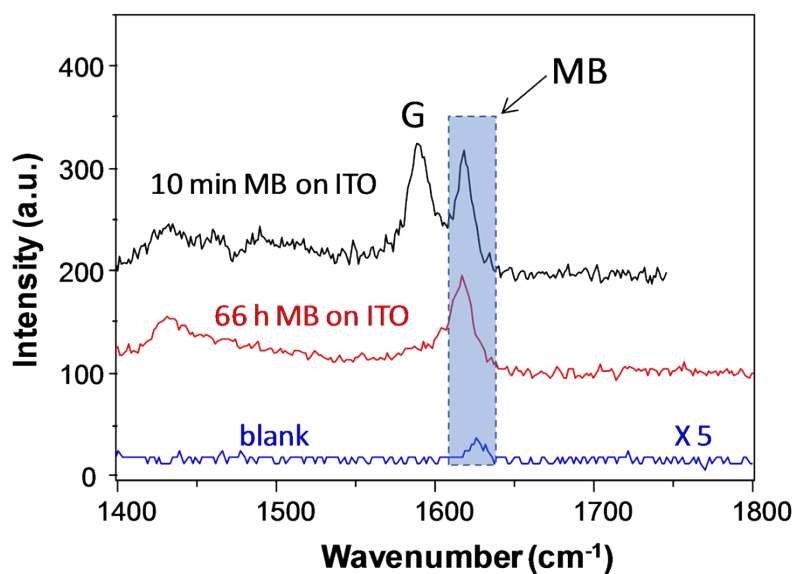

**Figure S3.** Selected Raman spectra for as-deposited Au NPs on graphene/ITO/glass and ITO/glass immersed in 0.3 mM MB solution during 10 min and 66 h, respectively along with a blank sample (bare ITO/glass immersed in MB).

**Table S1.** The table shows the immersion time, MB band position, Intensity, and SERS achieved by both platforms along with MB in solution used as a blank.

| Sample                   | MB immersion time (min) | MB Band position (cm <sup>-1</sup> ) | Intensity | SERS |
|--------------------------|-------------------------|--------------------------------------|-----------|------|
| MB (0.3 mM) solution     | /                       | 1624                                 | 8         | /    |
| MB + Au NPs on ITO/glass | 10                      | 1617                                 | 20        | 2.5  |
|                          | 3960                    | 1622                                 | 98        | 12   |
| MB + Au NPs on graphene  | 10                      | 1617                                 | 68        | 8.5  |
